# Supplementary material
Source: PubMed Central journal article supplement (PMC4204373)
Supplement: Pozniak_supplementary_table_1.pdf [file Pozniak_supplementary_table_1.pdf]

[Supplementary online-only material for Pozniak A, Hadden L, Rhodes W, Minden S: Change in perceived health insurance coverage among people with multiple sclerosis. *Int J MS Care*. 2014;16(3):132–139.]

**Supplementary Table 1. Patient characteristics of entire 2009 Slifka Study sample, unweighted and weighted observations**

| Characteristic                              | Unweighted % ± SE   | Unweighted n | Weighted % ± SE     | Weighted n     |
|---------------------------------------------|---------------------|--------------|---------------------|----------------|
| <b>Total sample</b>                         | <b>100.0 ± 0.00</b> | <b>2,361</b> | <b>100.0 ± 0.00</b> | <b>400,000</b> |
| <b>Gender</b>                               |                     |              |                     |                |
| Male                                        | 21.0 ± 0.84         | 495          | 22.2 ± 1.04         | 88,625         |
| Female                                      | 79.0 ± 0.84         | 1,866        | 77.8 ± 1.04         | 311,375        |
| <b>Age category</b>                         |                     |              |                     |                |
| 18–34                                       | 5.5 ± 0.47          | 129          | 3.3 ± 0.31          | 12,988         |
| 35–54                                       | 44.7 ± 1.02         | 1,054        | 34.6 ± 1.10         | 138,374        |
| 55–64                                       | 34.1 ± 0.98         | 804          | 38.2 ± 1.23         | 152,482        |
| 65+                                         | 15.7 ± 0.75         | 371          | 23.9 ± 1.20         | 95,519         |
| <b>Race</b>                                 |                     |              |                     |                |
| White                                       | 88.2 ± 0.67         | 2,059        | 89.6 ± 0.70         | 354,890        |
| Black                                       | 7.4 ± 0.54          | 172          | 6.5 ± 0.56          | 25,743         |
| Other/multiple races                        | 4.5 ± 0.43          | 104          | 3.9 ± 0.44          | 15,274         |
| <b>Hispanic</b>                             |                     |              |                     |                |
| Yes                                         | 5.2 ± 0.46          | 122          | 4.6 ± 0.48          | 18,365         |
| No                                          | 94.8 ± 0.46         | 2,234        | 95.4 ± 0.48         | 380,592        |
| <b>Educational attainment</b>               |                     |              |                     |                |
| Less than high school                       | 3.0 ± 0.35          | 70           | 3.0 ± 0.41          | 11,818         |
| High school/equivalent                      | 14.7 ± 0.73         | 347          | 15.9 ± 0.94         | 63,658         |
| Some college/certificate/associate's degree | 31.2 ± 0.95         | 736          | 31.5 ± 1.15         | 125,802        |
| College                                     | 29.0 ± 0.94         | 684          | 28.0 ± 1.11         | 111,724        |
| Professional/graduate/postgraduate          | 22.1 ± 0.85         | 520          | 21.6 ± 1.02         | 86,313         |
| <b>Work status</b>                          |                     |              |                     |                |
| Not working                                 | 57.9 ± 1.02         | 1,363        | 64.1 ± 1.16         | 256,019        |
| Working                                     | 42.1 ± 1.02         | 991          | 35.9 ± 1.16         | 143,189        |
| <b>Household income</b>                     |                     |              |                     |                |

|                                          |             |       |             |         |
|------------------------------------------|-------------|-------|-------------|---------|
| \$0 to <\$25,000                         | 16.9 ± 0.80 | 369   | 18.7 ± 1.04 | 68,382  |
| \$25,000 to <\$50,000                    | 22.1 ± 0.89 | 483   | 23.5 ± 1.12 | 86,287  |
| \$50,000 to <\$100,000                   | 35.5 ± 1.02 | 777   | 34.7 ± 1.22 | 127,019 |
| \$100,000+                               | 25.5 ± 0.93 | 557   | 23.1 ± 1.05 | 84,820  |
| <b>Urban/rural status</b>                |             |       |             |         |
| Urban                                    | 82.2 ± 0.79 | 1,941 | 81.2 ± 1.00 | 324,649 |
| Rural                                    | 17.8 ± 0.79 | 420   | 18.8 ± 1.00 | 75,351  |
| <b>Marital status</b>                    |             |       |             |         |
| Married or living together               | 71.0 ± 0.93 | 1,675 | 69.5 ± 1.17 | 277,653 |
| Widowed                                  | 5.2 ± 0.46  | 123   | 8.0 ± 0.79  | 31,933  |
| Divorced                                 | 11.6 ± 0.66 | 274   | 12.7 ± 0.86 | 50,595  |
| Separated                                | 1.9 ± 0.28  | 44    | 1.6 ± 0.29  | 6,376   |
| Never married                            | 10.3 ± 0.63 | 244   | 8.3 ± 0.60  | 32,985  |
| <b>Time since diagnosis</b>              |             |       |             |         |
| <2 years                                 | 4.6 ± 0.43  | 108   | 2.5 ± 0.24  | 9,931   |
| 2–5 years                                | 16.1 ± 0.76 | 378   | 10.0 ± 0.56 | 39,906  |
| 6–15 years                               | 39.8 ± 1.01 | 937   | 25.7 ± 0.90 | 102,155 |
| 16+ years                                | 39.5 ± 1.01 | 930   | 61.8 ± 1.09 | 245,908 |
| <b>Disease course</b>                    |             |       |             |         |
| Relapsing-remitting                      | 65.3 ± 0.98 | 1,526 | 57.9 ± 1.26 | 228,778 |
| Secondary progressive                    | 22.6 ± 0.87 | 528   | 27.7 ± 1.18 | 109,539 |
| Primary progressive                      | 8.6 ± 0.58  | 201   | 10.3 ± 0.80 | 40,526  |
| Progressive relapsing                    | 3.5 ± 0.38  | 82    | 4.1 ± 0.52  | 16,266  |
| <b>Disability status</b>                 |             |       |             |         |
| No/mild MS symptoms not limiting walking | 26.0 ± 0.90 | 612   | 22.9 ± 1.02 | 91,557  |
| No visible problems with walking         | 23.4 ± 0.87 | 552   | 20.3 ± 0.96 | 81,169  |
| Trouble walking, no aid                  | 8.1 ± 0.56  | 190   | 7.0 ± 0.58  | 27,880  |
| Can walk 25 feet without aid             | 9.9 ± 0.62  | 234   | 9.5 ± 0.70  | 38,070  |
| Need one-sided support to walk 25 feet   | 12.3 ± 0.68 | 290   | 13.7 ± 0.88 | 54,505  |
| Need two-sided support to walk 25 feet   | 8.0 ± 0.56  | 188   | 9.6 ± 0.78  | 38,285  |
| Wheelchair/scooter                       | 11.9 ± 0.67 | 281   | 16.5 ± 1.02 | 65,986  |
| Bedridden                                | 0.3 ± 0.12  | 8     | 0.4 ± 0.19  | 1,745   |
| <b>Current DMA use</b>                   |             |       |             |         |
| Not currently taking a DMA               | 38.5 ± 1.00 | 909   | 46.3 ± 1.26 | 185,202 |
| Currently taking a DMA                   | 61.5 ± 1.00 | 1,452 | 53.7 ± 1.26 | 214,799 |
| <b>Any relapses</b>                      |             |       |             |         |
| Yes                                      | 38.2 ± 1.01 | 893   | 35.0 ± 1.17 | 138,076 |
| No                                       | 61.8 ± 1.01 | 1,442 | 65.0 ± 1.17 | 256,915 |
| <b>Number of relapses</b>                |             |       |             |         |
| 0                                        | 62.2 ± 1.01 | 1,442 | 65.6 ± 1.16 | 256,915 |

|                                                     |             |       |             |         |
|-----------------------------------------------------|-------------|-------|-------------|---------|
| 1                                                   | 16.3 ± 0.77 | 377   | 14.5 ± 0.83 | 56,775  |
| 2                                                   | 10.3 ± 0.63 | 239   | 9.7 ± 0.73  | 38,105  |
| 3                                                   | 5.7 ± 0.48  | 133   | 5.0 ± 0.51  | 19,771  |
| 4+                                                  | 5.5 ± 0.47  | 128   | 5.1 ± 0.53  | 20,017  |
| <b>Currently insured</b>                            |             |       |             |         |
| Yes                                                 | 97.7 ± 0.31 | 2,306 | 97.9 ± 0.34 | 391,607 |
| No                                                  | 2.3 ± 0.31  | 55    | 2.1 ± 0.34  | 8,393   |
| <b>Categorized main insurance type (if insured)</b> |             |       |             |         |
| Private                                             | 64.9 ± 1.00 | 1,489 | 58.6 ± 1.27 | 227,773 |
| Medicare (includes Medigap)                         | 28.0 ± 0.94 | 642   | 33.9 ± 1.24 | 131,735 |
| Medicaid                                            | 2.4 ± 0.32  | 56    | 2.5 ± 0.41  | 9,863   |
| Other public insurance                              | 4.7 ± 0.44  | 108   | 5.0 ± 0.58  | 19,592  |
| <b>Number of health plans (if insured)</b>          |             |       |             |         |
| 1                                                   | 62.4 ± 1.01 | 1,437 | 55.8 ± 1.27 | 218,244 |
| 2                                                   | 34.4 ± 0.99 | 793   | 40.1 ± 1.26 | 156,658 |
| 3+                                                  | 3.2 ± 0.37  | 73    | 4.1 ± 0.55  | 16,034  |

Abbreviations: DMA, disease-modifying agent; MS, multiple sclerosis.
